# Supplementary material for: Screening for Liver Fibrosis and Steatosis in a Large Cohort of Patients with Type 2 Diabetes Using Vibration Controlled Transient Elastography and Controlled Attenuation Parameter in a Single-Center Real-Life Experience
Source: MDPI journal article supplement (doi:10.3390/jcm9041032), 2020-04-06
Supplement: s1 [file s1]

# Supplementary Materials

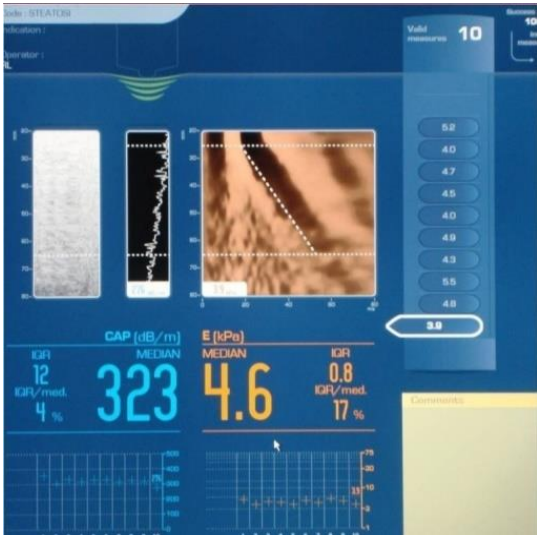

**Figure S1.** Vibration Controlled Transient Elastography (VCTE) and Controlled Attenuation Parameter (CAP) from the Fibroscan® device.
